# Supplementary material
Source: publisher figshare collection journal article supplement (https://acs.figshare.com/ndownloader/files/4612843)
Supplement: Supplementary file 1 [file 4612843]

Supporting Information for “Disproportionation Pathways of the Hyponitrite Radical ( $\text{HN}_2\text{O}_2^\bullet/\text{N}_2\text{O}_2^\bullet$ )” by Gregory A. Poskrebyshev, Vladimir Shafirovich, and Sergei V. Lymar.

### Kinetic Modeling.

The absorbance-time kinetic profiles were modeled by numerical integration using rate, spectral, and yield data compiled in Tables S1 and S2. During fitting, these parameters were not allowed to deviate beyond 10% from their nominal values; in most cases, good fits were obtained by adjusting parameters within 5%.

**TABLE S1.** Reactions and their nominal rate constants.

| <i>N</i>  | Reaction                                                                                                                 | $k, \text{M}^{-1} \text{s}^{-1}$ | Reference                   |
|-----------|--------------------------------------------------------------------------------------------------------------------------|----------------------------------|-----------------------------|
| <b>6a</b> | $\text{N}_2\text{O}_2^\bullet + \text{N}_2\text{O}_2^\bullet \rightarrow \text{N}_2\text{O}_2^{2-} + 2\text{NO}^\bullet$ | $4.1 \times 10^7$ <sup>a</sup>   | This work                   |
| <b>10</b> | $\text{N}_2\text{O}_2^\bullet + \text{NO}^\bullet \rightarrow \text{N}_3\text{O}_3^-$                                    | $5.4 \times 10^9$                | [1]                         |
| <b>11</b> | $\text{N}_3\text{O}_3^- \rightarrow \text{NO}_2^- + \text{N}_2\text{O}$                                                  | 300 <sup>b</sup>                 | This work and [1], [2], [3] |
| <b>17</b> | $\text{NO} + \text{O}_2^\bullet \rightarrow \text{ONOO}^-$                                                               | $4.8 \times 10^9$                | [4] and refs. therein       |

<sup>a</sup>) At zero ionic strength; appropriate Debye-Hückel corrections were applied for modeling. <sup>b</sup>) In units of  $\text{s}^{-1}$ .

**TABLE S2.** Nominal molar absorptivities and radiation yields (in number of radicals per 100 eV absorbed energy).

| Absorbing species                           | Wavelength, nm | $\epsilon$ , M <sup>-1</sup> cm <sup>-1</sup> | Reference | Radiation yield                    |                                                     |
|---------------------------------------------|----------------|-----------------------------------------------|-----------|------------------------------------|-----------------------------------------------------|
|                                             |                |                                               |           | O <sub>2</sub> -saturated solution | N <sub>2</sub> O/O <sub>2</sub> -saturated solution |
| N <sub>2</sub> O <sub>2</sub> <sup>•-</sup> | 290            | 5900                                          | [5]       | 2.8                                | 6.0                                                 |
|                                             | 300            | 3100                                          |           |                                    |                                                     |
|                                             | 380            | 820                                           |           |                                    |                                                     |
| N <sub>3</sub> O <sub>3</sub> <sup>-</sup>  | 290            | 450                                           | [1]       | N/A                                | N/A                                                 |
|                                             | 300            | 400                                           |           |                                    |                                                     |
|                                             | 380            | 3760                                          |           |                                    |                                                     |
| O <sub>2</sub> <sup>•-</sup>                | 290            | 520                                           | [6, 7]    | 3.4                                | 0.6                                                 |
|                                             | 300            | 410                                           |           |                                    |                                                     |
| ONOO <sup>-</sup>                           | 290            | 1520                                          | [8]       | N/A                                | N/A                                                 |
|                                             | 300            | 1650                                          |           |                                    |                                                     |

References:

- [1] S. V. Lymar, V. Shafirovich, G. A. Poskrebyshv, *Inorg. Chem.* **2005**, *44*, 5212.
- [2] W. A. Seddon, M. J. Young, *Can. J. Chem.* **1970**, *48*, 393.
- [3] W. A. Seddon, J. W. Fletcher, F. C. Sopchyshyn, *Can. J. Chem.* **1973**, *51*, 1123.
- [4] S. V. Lymar, G. A. Poskrebyshv, *J. Phys. Chem. A* **2003**, *107*, 7991.
- [5] G. A. Poskrebyshv, V. Shafirovich, S. V. Lymar, *J. Am. Chem. Soc.* **2004**, *126*, 891.
- [6] B. H. J. Bielski, D. E. Cabelli, R. L. Arudi, A. B. Ross, *J. Phys. Chem. Ref. Data* **1985**, *14*, 1041.
- [7] B. H. J. Bielski, *Photochem. Photobiol.* **1978**, *28*, 645.
- [8] M. N. Hughes, H. G. Nicklin, *J. Chem. Soc. (A)* **1968**, 450.

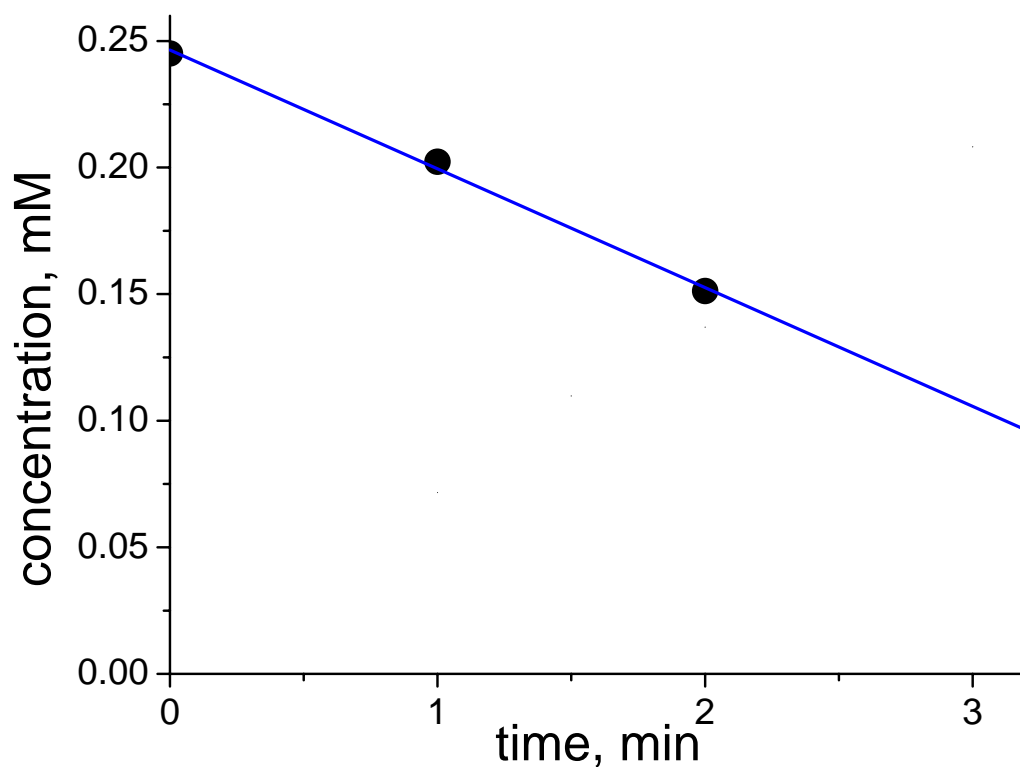

**Figure S1.** Consumption of  $\text{N}_2\text{O}_2^{2-}$  measured spectrophotometrically and using  $\epsilon_{248} = 6550 \text{ M}^{-1} \text{ cm}^{-1}$  in alkaline (25 mM NaOH),  $\text{N}_2\text{O}$ -saturated solution of  $\text{Na}_2\text{N}_2\text{O}_2$  under continuous gamma-radiolysis with a Co-60 source at an 110 Gy/min dose rate. The line slope corresponds to a 0.047 mM/min consumption rate. The rate of  $\text{OH}^\bullet$  radical generation calculated from Fricke dosimetry and using radiation yield of 6.1  $\text{OH}^\bullet$  radicals per 100 eV of absorbed radiation energy amounts to 0.070 mM/min, which yields the rate ratio of 0.67.

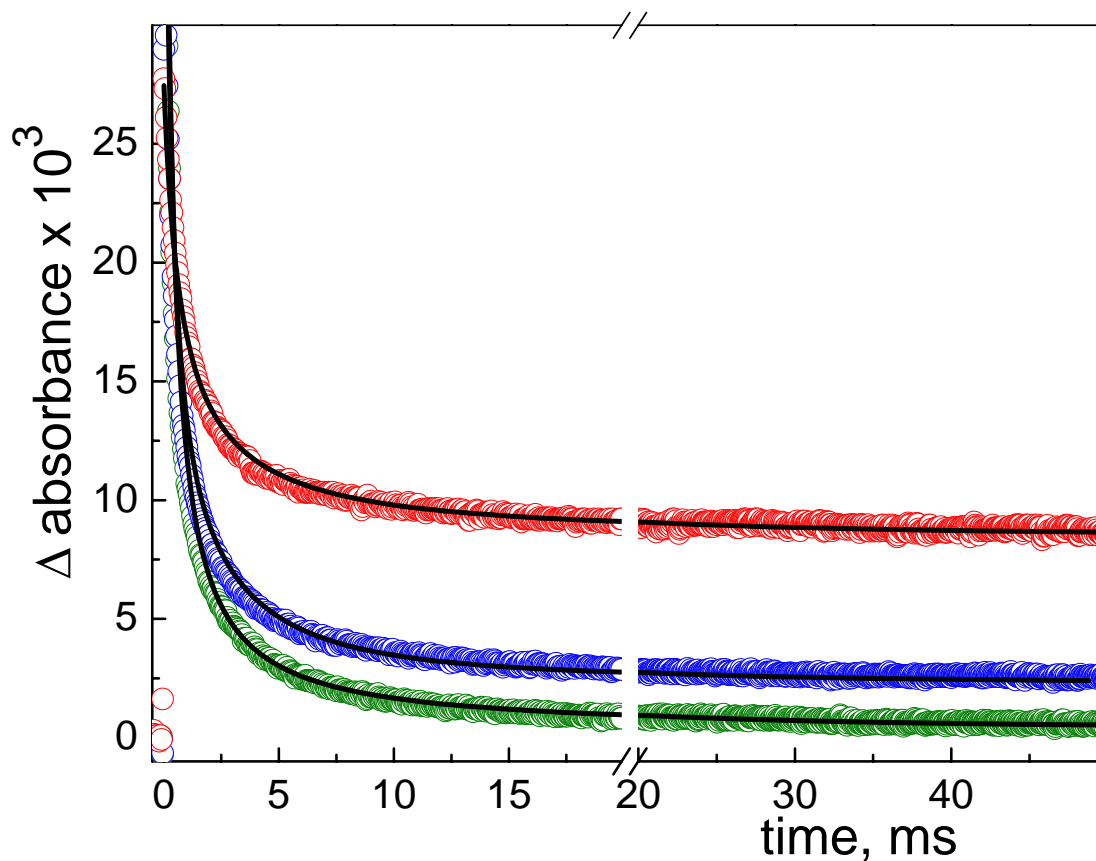

**Figure S2.** Kinetic traces recorded at 300 nm (open circles) following pulse radiolysis (doses 26–28 Gy) of 4.8 mM  $\text{Na}_2\text{N}_2\text{O}_2$  in 5 mM Borax buffer (pH 9.2). Green trace:  $\text{N}_2\text{O}$ -saturated solution; blue trace: solution saturated with 9:1  $\text{N}_2\text{O}/\text{O}_2$  mixture; red trace: pure  $\text{O}_2$ -saturated solution. Black lines show fits by kinetic simulations using rates, molar absorptivities, and radiation yields data from Tables S1 and S2. Note the time scale break.

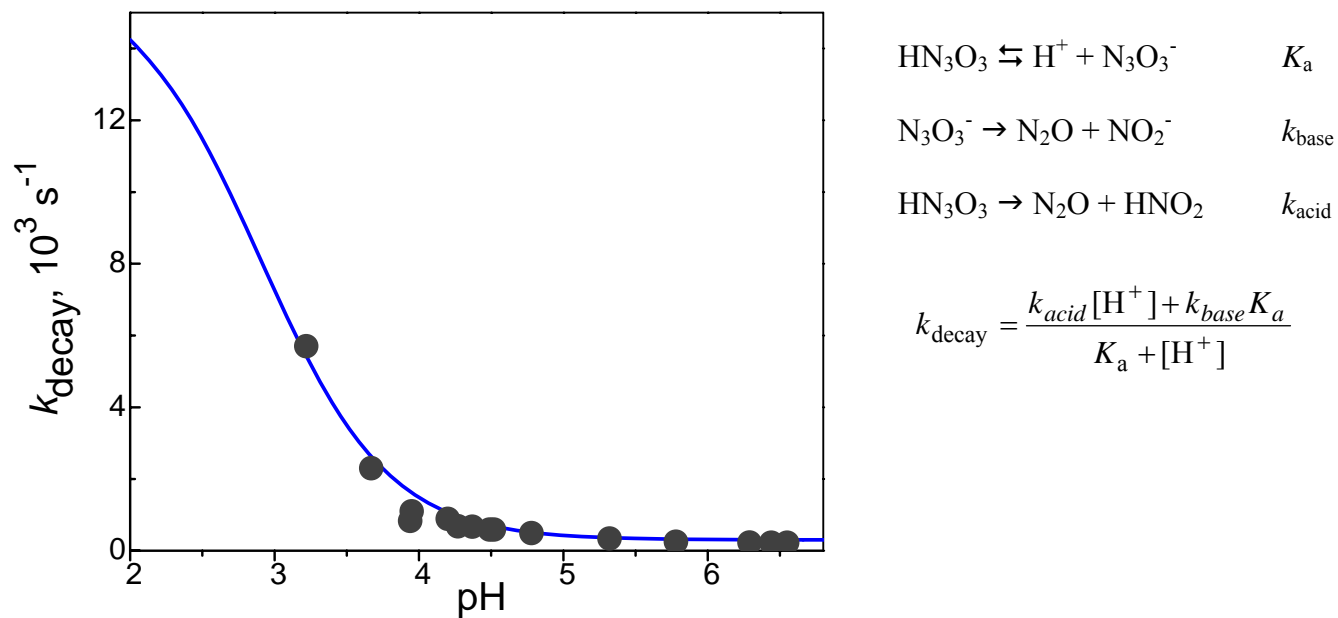

**Figure S3.** pH dependence of the  $\text{HN}_3\text{O}_3/\text{N}_3\text{O}_3^-$  decay observed at 380 nm (circles) following pulse radiolysis of  $\text{N}_2\text{O}$ -saturated hyponitrite solutions. The blue line shows the expected dependence for  $\text{p}K_a = 2.9$ ,  $k_{\text{base}} = 320 \text{ s}^{-1}$  and  $k_{\text{acid}} = 1.6 \times 10^4 \text{ s}^{-1}$ .
